# Supplementary material for: Interdecadal glacier inventories in the Karakoram since the 1990s
Source: Copernicus journal article supplement (doi:10.5194/essd-15-847-2023), 2023-02-15
Supplement: Supplementary file 1 [file essd-15-847-2023-supplement.pdf]

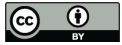

*Supplement of*

## **Interdecadal glacier inventories in the Karakoram since the 1990s**

**Fuming Xie et al.**

*Correspondence to:* Shiyin Liu ([shiyin.liu@ynu.edu.cn](mailto:shiyin.liu@ynu.edu.cn))

The copyright of individual parts of the supplement might differ from the article licence.

## Supplementary information

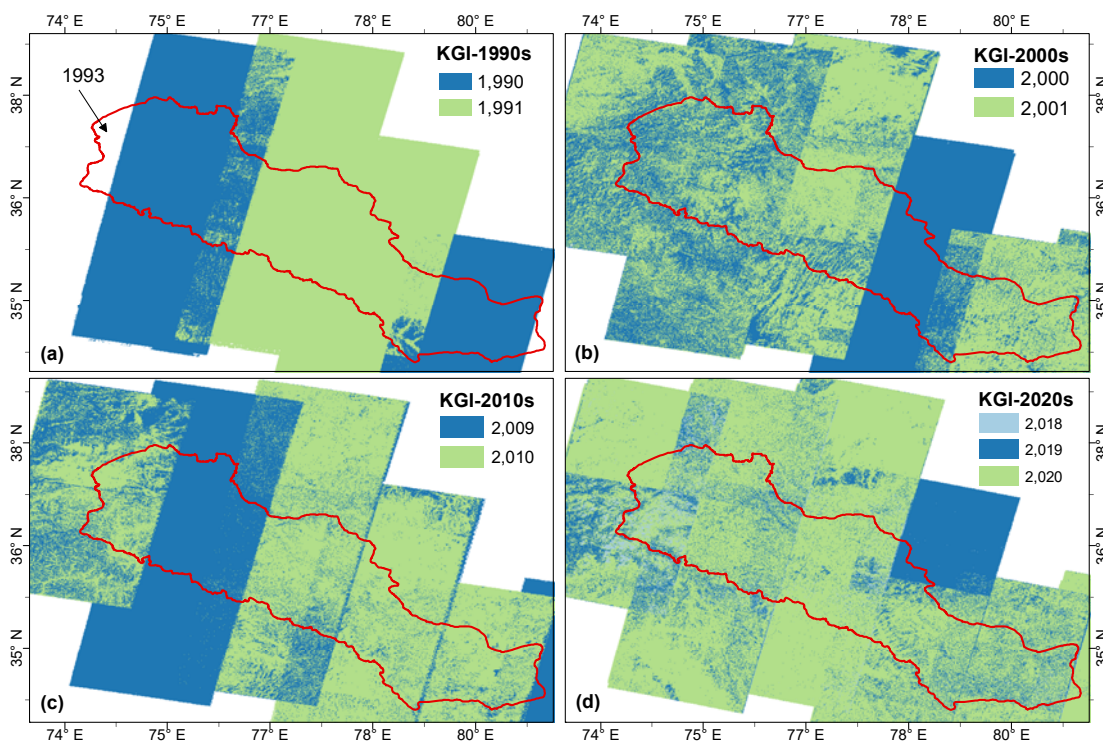

**Fig. S1** Original image date (year) for each pixel of the composite images have been used in Karakoram glacier inventory. (a) Except for the pixels from 1993, the pixels from 1990 accounted for 55.58%, while some glaciers in the central region (Fig. 1d) were manually corrected on a base image from 1994. (b) In the composite image of the 2000s, 44.25 % of the pixels were accepted from 2000 and the rest were from 2001. (c) Most of the pixels in the composited images during 2010s are from 2010, accounting for 56.93%. (d) In 2020s, 75.29% of pixels are from 2020, 4.18% in 2018 and 20.53% in 2019.

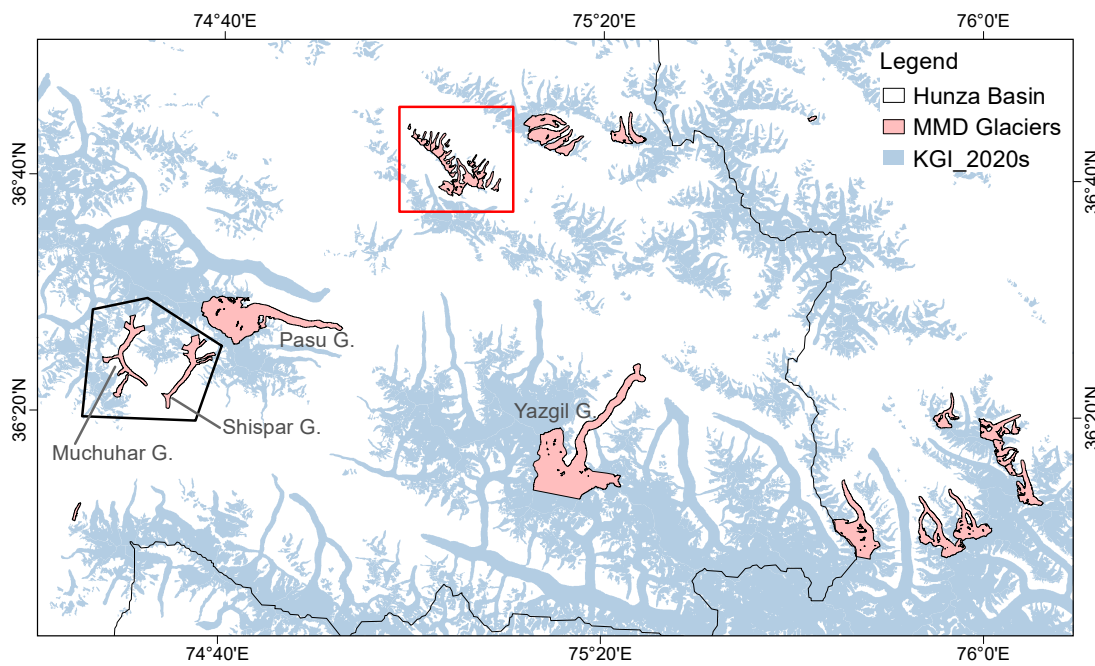

**Fig S2** Distribution of glaciers selected for the MMD experiment. All the glaciers except those in the red rectangle and black polygon are repeatedly digitized (five times) based on Sentinel-2 images. Inside the black polygonal frame is the ablation area of the Shispar and Muchuhar glacier, manually digitized (once) based on Planet 3-m image, while the red rectangle shows glaciers digitized from both Landsat-8 (four times) and Sentinel-2 images (once).

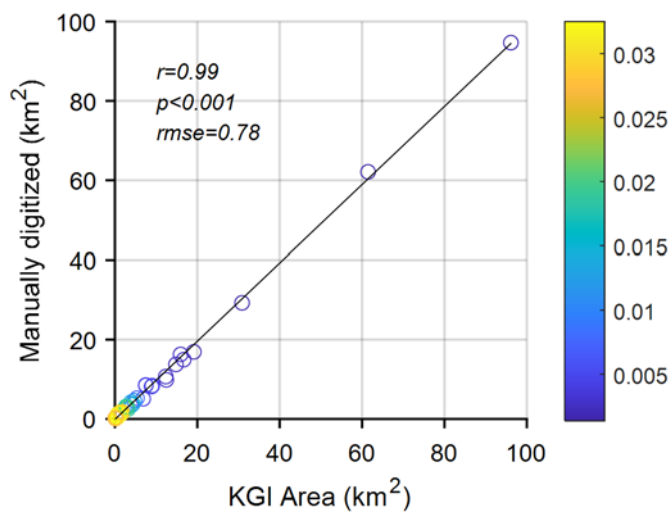

**Fig. S3** Linear fit of multi-manual digitizations (mean values) to the glacier area derived from KGI-2020s. The color bar represents the data density.

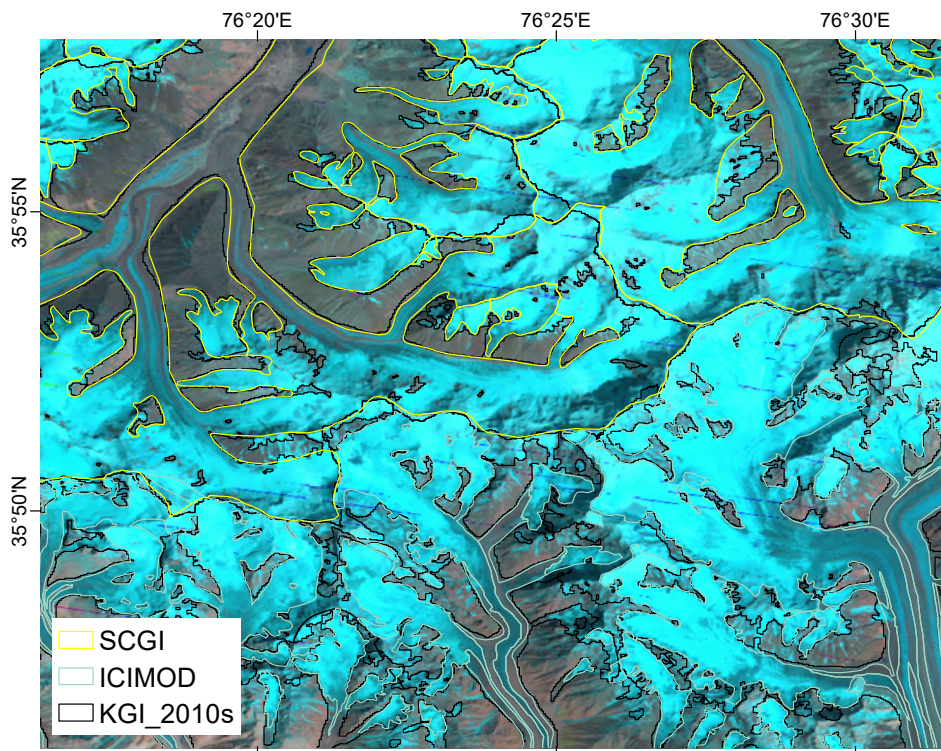

**Fig. S4** Comparison of glacier inventory among SCGI, ICIMOD and KGI-2010s.

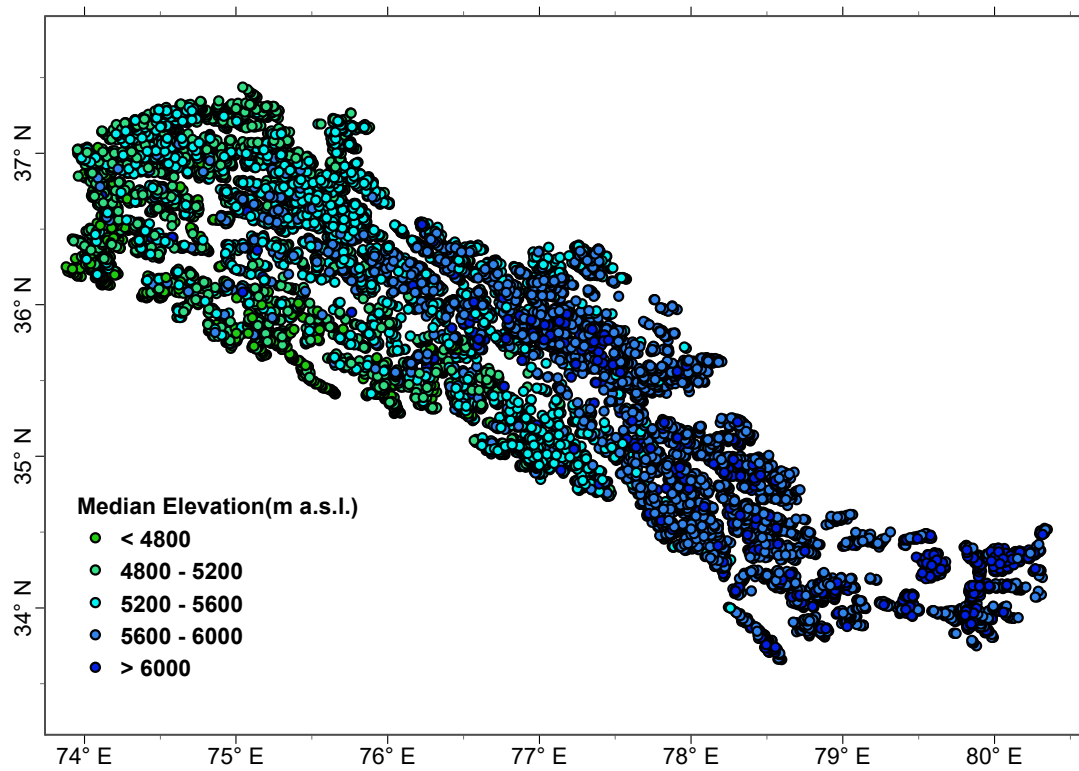

**Fig. S5** Median elevation of the glaciers in the Karakoram.

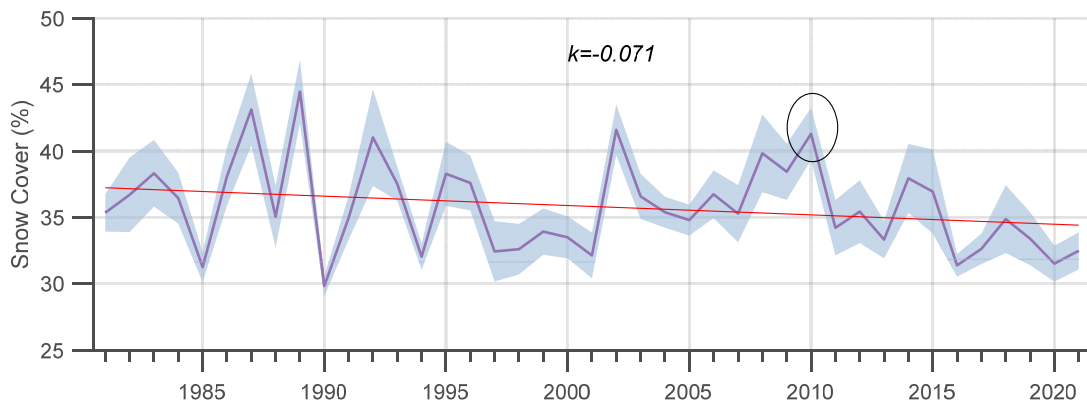

**Fig. S6** Time series of summer melting season (DOY: 200-270) snow cover (regional median values) derived from ERA5-Land hourly climate reanalysis. Blue area refers to 95% confidence interval.

**Table S1.** List of Landsat TM/ETM+/OLI scenes used to map outlines of Karakoram glaciers. (P: WRS Path, R: WRS Row, AD: Acquired date, SA: Sun Azimuth, SE: Sun Elevation, CC: Cloud cover)

| Periods | Satellite     | Image ID              | P   | R  | AD        | SA(°)  | SE(°) | CC(%) |
|---------|---------------|-----------------------|-----|----|-----------|--------|-------|-------|
| 1990s   | LANDSAT5_TM   | LT51460361990214ISP00 | 146 | 36 | 1990/8/2  | 111.4  | 56.32 | 1     |
|         | LANDSAT5_TM   | LT51460371990214ISP00 | 146 | 37 | 1990/8/2  | 109.07 | 56.58 | 1     |
|         | LANDSAT5_TM   | LT51470351991240ISP00 | 147 | 35 | 1991/8/28 | 125.92 | 52.01 | 1     |
|         | LANDSAT5_TM   | LT51470361991240ISP00 | 147 | 36 | 1991/8/28 | 124.03 | 52.62 | 10    |
|         | LANDSAT5_TM   | LT51480341991231ISP00 | 148 | 34 | 1991/8/19 | 123.75 | 53.26 | 7     |
|         | LANDSAT5_TM   | LT51480341991263ISP00 | 148 | 34 | 1991/9/20 | 137.78 | 45.52 | 15    |
|         | LANDSAT5_TM   | LT51480351991231ISP00 | 148 | 35 | 1991/8/19 | 121.74 | 53.82 | 16    |
|         | LANDSAT5_TM   | LT51480351991263ISP00 | 148 | 35 | 1991/9/20 | 136.38 | 46.39 | 28    |
|         | LANDSAT5_TM   | LT51480361991231ISP00 | 148 | 36 | 1991/8/19 | 119.68 | 54.33 | 30    |
|         | LANDSAT5_TM   | LT51480361991263ISP00 | 148 | 36 | 1991/9/20 | 134.93 | 47.24 | 29    |
|         | LANDSAT5_TM   | LT51490341990219ISP00 | 149 | 34 | 1990/8/7  | 117.83 | 54.81 | 1     |
|         | LANDSAT5_TM   | LT51490351990219ISP00 | 149 | 35 | 1990/8/7  | 115.64 | 55.23 | 1     |
|         | LANDSAT5_TM   | LT51490361990219ISP00 | 149 | 36 | 1990/8/7  | 113.42 | 55.59 | 29    |
|         | LANDSAT5_TM   | LT51510351993209ISP00 | 151 | 35 | 1993/7/28 | 112.68 | 57.16 | 8     |
|         | LANDSAT5_TM   | LT51480351994207ISP00 | 148 | 35 | 1994/7/26 | 110.71 | 56.56 | 12    |
| 2000s   | LANDSAT7_ETM+ | LE71450362000259SGS00 | 145 | 36 | 2000/9/15 | 141.72 | 52.06 | 13    |
|         | LANDSAT7_ETM+ | LE71450362001261SGS00 | 145 | 36 | 2001/9/18 | 142.14 | 50.98 | 11    |
|         | LANDSAT7_ETM+ | LE71450372000259SGS00 | 145 | 37 | 2000/9/15 | 140.12 | 53.02 | 18    |
|         | LANDSAT7_ETM+ | LE71450372001261SGS00 | 145 | 37 | 2001/9/18 | 140.61 | 51.95 | 1     |
|         | LANDSAT7_ETM+ | LE71460362000234SGS00 | 146 | 36 | 2000/8/21 | 129.75 | 58.41 | 26    |
|         | LANDSAT7_ETM+ | LE71460362001268EDC00 | 146 | 36 | 2001/9/25 | 145.01 | 48.89 | 5     |
|         | LANDSAT7_ETM+ | LE71460372000234SGS00 | 146 | 37 | 2000/8/21 | 127.49 | 59.11 | 6     |
|         | LANDSAT7_ETM+ | LE71460372001236SGS00 | 146 | 37 | 2001/8/24 | 128.15 | 58.16 | 29    |
|         | LANDSAT7_ETM+ | LE71460372001252SGS00 | 146 | 37 | 2001/9/9  | 136.36 | 54.39 | 25    |
|         | LANDSAT7_ETM+ | LE71460372001268EDC00 | 146 | 37 | 2001/9/25 | 143.63 | 49.91 | 24    |
|         | LANDSAT7_ETM+ | LE71470352000241SGS00 | 147 | 35 | 2000/8/28 | 135.22 | 55.99 | 8     |
|         | LANDSAT7_ETM+ | LE71470362000241SGS00 | 147 | 36 | 2000/8/28 | 133.23 | 56.81 | 9     |

| Periods | Satellite     | Image ID              | P   | R  | AD        | SA(°)  | SE(°) | CC(%) |
|---------|---------------|-----------------------|-----|----|-----------|--------|-------|-------|
|         | LANDSAT7_ETM+ | LE71470362000257SGS00 | 147 | 36 | 2000/9/13 | 140.83 | 52.63 | 21    |
|         | LANDSAT7_ETM+ | LE71470372000241SGS00 | 147 | 37 | 2000/8/28 | 131.16 | 57.59 | 24    |
|         | LANDSAT7_ETM+ | LE71470372000257SGS00 | 147 | 37 | 2000/9/13 | 139.19 | 53.57 | 19    |
|         | LANDSAT7_ETM+ | LE71480342000216SGS01 | 148 | 34 | 2000/8/3  | 126.46 | 60.67 | 6     |
|         | LANDSAT7_ETM+ | LE71480342000232SGS00 | 148 | 34 | 2000/8/19 | 133.15 | 57.34 | 9     |
|         | LANDSAT7_ETM+ | LE71480342001202SGS00 | 148 | 34 | 2001/7/21 | 121.18 | 62.46 | 14    |
|         | LANDSAT7_ETM+ | LE71480342001250SGS00 | 148 | 34 | 2001/9/7  | 140.57 | 52.21 | 21    |
|         | LANDSAT7_ETM+ | LE71480352000216SGS01 | 148 | 35 | 2000/8/3  | 123.89 | 61.28 | 10    |
|         | LANDSAT7_ETM+ | LE71480352000248SGS00 | 148 | 35 | 2000/9/4  | 138.45 | 54.18 | 21    |
|         | LANDSAT7_ETM+ | LE71480352001202SGS00 | 148 | 35 | 2001/7/21 | 118.34 | 62.95 | 8     |
|         | LANDSAT7_ETM+ | LE71480352001266EDC00 | 148 | 35 | 2001/9/23 | 145.58 | 48.47 | 9     |
|         | LANDSAT7_ETM+ | LE71480362000248SGS00 | 148 | 36 | 2000/9/4  | 136.65 | 55.07 | 4     |
|         | LANDSAT7_ETM+ | LE71480362001266EDC00 | 148 | 36 | 2001/9/23 | 144.22 | 49.49 | 27    |
|         | LANDSAT7_ETM+ | LE71490342000255SGS00 | 149 | 34 | 2000/9/11 | 143.12 | 51.26 | 3     |
|         | LANDSAT7_ETM+ | LE71490342001241SGS00 | 149 | 34 | 2001/8/29 | 136.66 | 54.64 | 27    |
|         | LANDSAT7_ETM+ | LE71490352000239SGS00 | 149 | 35 | 2000/8/26 | 134.29 | 56.48 | 24    |
|         | LANDSAT7_ETM+ | LE71490352000255SGS00 | 149 | 35 | 2000/9/11 | 141.55 | 52.24 | 5     |
|         | LANDSAT7_ETM+ | LE71490352001241SGS00 | 149 | 35 | 2001/8/29 | 134.78 | 55.48 | 10    |
|         | LANDSAT7_ETM+ | LE71490362000239SGS00 | 149 | 36 | 2000/8/26 | 132.24 | 57.28 | 9     |
|         | LANDSAT7_ETM+ | LE71490362000255SGS00 | 149 | 36 | 2000/9/11 | 139.93 | 53.19 | 4     |
|         | LANDSAT7_ETM+ | LE71490362001241SGS00 | 149 | 36 | 2001/8/29 | 132.82 | 56.29 | 5     |
|         | LANDSAT7_ETM+ | LE71500342000230SGS00 | 150 | 34 | 2000/8/17 | 132.28 | 57.8  | 15    |
|         | LANDSAT7_ETM+ | LE71500342000246SGS01 | 150 | 34 | 2000/9/2  | 139.32 | 53.81 | 4     |
|         | LANDSAT7_ETM+ | LE71500342001248SGS00 | 150 | 34 | 2001/9/5  | 139.72 | 52.77 | 11    |
|         | LANDSAT7_ETM+ | LE71500352000230SGS00 | 150 | 35 | 2000/8/17 | 130.08 | 58.55 | 27    |
|         | LANDSAT7_ETM+ | LE71500352000246SGS01 | 150 | 35 | 2000/9/2  | 137.53 | 54.71 | 21    |
|         | LANDSAT7_ETM+ | LE71500352001232SGS00 | 150 | 35 | 2001/8/20 | 130.56 | 57.59 | 27    |
| 2010s   | LANDSAT5_TM   | LT51450362009227KHC00 | 145 | 36 | 2009/8/15 | 126.17 | 59.44 | 5     |
|         | LANDSAT5_TM   | LT51450372009259KHC00 | 145 | 37 | 2009/9/16 | 140.26 | 52.7  | 7     |
|         | LANDSAT5_TM   | LT51460362009218KHC00 | 146 | 36 | 2009/8/6  | 121.87 | 61.05 | 5     |
|         | LANDSAT5_TM   | LT51460362009250KHC00 | 146 | 36 | 2009/9/7  | 137.67 | 54.19 | 2     |
|         | LANDSAT5_TM   | LT51460362009266KHC00 | 146 | 36 | 2009/9/23 | 144.83 | 49.68 | 9     |
|         | LANDSAT5_TM   | LT51460362010237KHC00 | 146 | 36 | 2010/8/25 | 131.35 | 57.52 | 13    |
|         | LANDSAT5_TM   | LT51460362010269KHC00 | 146 | 36 | 2010/9/26 | 145.97 | 48.85 | 19    |
|         | LANDSAT5_TM   | LT51460372009234KHC00 | 146 | 37 | 2009/8/22 | 127.45 | 58.71 | 19    |
|         | LANDSAT5_TM   | LT51460372009250KHC00 | 146 | 37 | 2009/9/7  | 135.85 | 55.07 | 1     |
|         | LANDSAT5_TM   | LT51460372009266KHC00 | 146 | 37 | 2009/9/23 | 143.42 | 50.7  | 3     |
|         | LANDSAT5_TM   | LT51460372010205KHC00 | 146 | 37 | 2010/7/24 | 113.88 | 63.66 | 24    |
|         | LANDSAT5_TM   | LT51460372010269KHC00 | 146 | 37 | 2010/9/26 | 144.61 | 49.89 | 7     |
|         | LANDSAT5_TM   | LT51470352009225KHC00 | 147 | 35 | 2009/8/13 | 127.6  | 59.16 | 1     |
|         | LANDSAT5_TM   | LT51470352009241KHC00 | 147 | 35 | 2009/8/29 | 135.19 | 55.61 | 2     |
|         | LANDSAT5_TM   | LT51470352010260KHC00 | 147 | 35 | 2010/9/17 | 143.77 | 50.54 | 13    |

| Periods      | Satellite    | Image ID              | P   | R  | AD        | SA(°)  | SE(°) | CC(%) |
|--------------|--------------|-----------------------|-----|----|-----------|--------|-------|-------|
|              | LANDSAT5_TM  | LT51470362009225KHC00 | 147 | 36 | 2009/8/13 | 125.2  | 59.81 | 2     |
|              | LANDSAT5_TM  | LT51470362009241KHC00 | 147 | 36 | 2009/8/29 | 133.21 | 56.43 | 20    |
|              | LANDSAT5_TM  | LT51470362010260KHC00 | 147 | 36 | 2010/9/17 | 142.27 | 51.54 | 3     |
|              | LANDSAT5_TM  | LT51470372009225KHC00 | 147 | 37 | 2009/8/13 | 122.71 | 60.41 | 10    |
|              | LANDSAT5_TM  | LT51470372009257KHC00 | 147 | 37 | 2009/9/14 | 139.32 | 53.24 | 7     |
|              | LANDSAT5_TM  | LT51470372010260KHC00 | 147 | 37 | 2010/9/17 | 140.72 | 52.5  | 8     |
|              | LANDSAT5_TM  | LT51480342009200KHC00 | 148 | 34 | 2009/7/19 | 120.65 | 62.73 | 14    |
|              | LANDSAT5_TM  | LT51480342009216KHC00 | 148 | 34 | 2009/8/4  | 126.12 | 60.22 | 22    |
|              | LANDSAT5_TM  | LT51480342009232KHC00 | 148 | 34 | 2009/8/20 | 133.01 | 56.94 | 6     |
|              | LANDSAT5_TM  | LT51480342009248KHC00 | 148 | 34 | 2009/9/5  | 140.19 | 52.91 | 4     |
|              | LANDSAT5_TM  | LT51480342009264KHC00 | 148 | 34 | 2009/9/21 | 146.76 | 48.21 | 1     |
|              | LANDSAT5_TM  | LT51480342010235KHC00 | 148 | 34 | 2010/8/23 | 134.54 | 56.41 | 1     |
|              | LANDSAT5_TM  | LT51480342010251KHC00 | 148 | 34 | 2010/9/8  | 141.55 | 52.19 | 15    |
|              | LANDSAT5_TM  | LT51480352009216KHC00 | 148 | 35 | 2009/8/4  | 123.59 | 60.82 | 5     |
|              | LANDSAT5_TM  | LT51480352009232KHC00 | 148 | 35 | 2009/8/20 | 130.89 | 57.71 | 14    |
|              | LANDSAT5_TM  | LT51480352010235KHC00 | 148 | 35 | 2010/8/23 | 132.49 | 57.21 | 2     |
|              | LANDSAT5_TM  | LT51480362009216KHC00 | 148 | 36 | 2009/8/4  | 120.96 | 61.37 | 2     |
|              | LANDSAT5_TM  | LT51480362009232KHC00 | 148 | 36 | 2009/8/20 | 128.68 | 58.43 | 17    |
|              | LANDSAT5_TM  | LT51480362009264KHC00 | 148 | 36 | 2009/9/21 | 144.01 | 50.28 | 3     |
|              | LANDSAT5_TM  | LT51480362010235KHC00 | 148 | 36 | 2010/8/23 | 130.36 | 57.97 | 17    |
|              | LANDSAT5_TM  | LT51490342009207KHC00 | 149 | 34 | 2009/7/26 | 122.8  | 61.72 | 2     |
|              | LANDSAT5_TM  | LT51490342009223KHC00 | 149 | 34 | 2009/8/11 | 129.03 | 58.88 | 8     |
|              | LANDSAT5_TM  | LT51490342009239KHC00 | 149 | 34 | 2009/8/27 | 136.17 | 55.27 | 2     |
|              | LANDSAT5_TM  | LT51490352009207KHC00 | 149 | 35 | 2009/7/26 | 120.05 | 62.24 | 6     |
|              | LANDSAT5_TM  | LT51490352009223KHC00 | 149 | 35 | 2009/8/11 | 126.68 | 59.55 | 6     |
|              | LANDSAT5_TM  | LT51490352009239KHC00 | 149 | 35 | 2009/8/27 | 134.24 | 56.1  | 3     |
|              | LANDSAT5_TM  | LT51490362009207KHC00 | 149 | 36 | 2009/7/26 | 117.23 | 62.71 | 16    |
|              | LANDSAT5_TM  | LT51490362009223KHC00 | 149 | 36 | 2009/8/11 | 124.23 | 60.18 | 15    |
|              | LANDSAT5_TM  | LT51490362009239KHC00 | 149 | 36 | 2009/8/27 | 132.21 | 56.9  | 2     |
|              | LANDSAT5_TM  | LT51490362009255KHC00 | 149 | 36 | 2009/9/12 | 140.03 | 52.85 | 18    |
|              | LANDSAT5_TM  | LT51500342009262KHC00 | 150 | 34 | 2009/9/19 | 146.01 | 48.82 | 12    |
|              | LANDSAT5_TM  | LT51500342010233KHC02 | 150 | 34 | 2010/8/21 | 133.66 | 56.88 | 17    |
|              | LANDSAT5_TM  | LT51500352009214KHC00 | 150 | 35 | 2009/8/2  | 122.76 | 61.15 | 11    |
|              | LANDSAT5_TM  | LT51500352009262KHC00 | 150 | 35 | 2009/9/19 | 144.61 | 49.85 | 2     |
|              | LANDSAT5_TM  | LT51500352010233KHC02 | 150 | 35 | 2010/8/21 | 131.55 | 57.66 | 7     |
| <b>2020s</b> | LANDSAT8_OLI | LC81450362018268LGN00 | 145 | 36 | 2018/9/25 | 149.01 | 50.25 | 12.4  |
|              | LANDSAT8_OLI | LC81450362019255LGN02 | 145 | 36 | 2019/9/12 | 143.69 | 54.33 | 1.19  |
|              | LANDSAT8_OLI | LC81450362020226LGN00 | 145 | 36 | 2020/8/13 | 129.3  | 61.52 | 11.23 |
|              | LANDSAT8_OLI | LC81450362020258LGN00 | 145 | 36 | 2020/9/14 | 144.89 | 53.52 | 0.76  |
|              | LANDSAT8_OLI | LC81450372019255LGN02 | 145 | 37 | 2019/9/12 | 142.01 | 55.32 | 0.28  |
|              | LANDSAT8_OLI | LC81450372020210LGN00 | 145 | 37 | 2020/7/28 | 118.9  | 64.85 | 22.82 |
|              | LANDSAT8_OLI | LC81450372020226LGN00 | 145 | 37 | 2020/8/13 | 126.73 | 62.21 | 16.5  |

| Periods | Satellite    | Image ID              | P   | R  | AD        | SA(°)  | SE(°) | CC(%) |
|---------|--------------|-----------------------|-----|----|-----------|--------|-------|-------|
|         | LANDSAT8_OLI | LC81450372020242LGN00 | 145 | 37 | 2020/8/29 | 135.26 | 58.77 | 3.55  |
|         | LANDSAT8_OLI | LC81450372020258LGN00 | 145 | 37 | 2020/9/14 | 143.28 | 54.53 | 0.2   |
|         | LANDSAT8_OLI | LC81460362018211LGN00 | 146 | 36 | 2018/7/30 | 122.34 | 64    | 10.29 |
|         | LANDSAT8_OLI | LC81460362018243LGN00 | 146 | 36 | 2018/8/31 | 137.85 | 57.45 | 0.64  |
|         | LANDSAT8_OLI | LC81460362018259LGN00 | 146 | 36 | 2018/9/16 | 145.33 | 53.01 | 17.62 |
|         | LANDSAT8_OLI | LC81460362019246LGN00 | 146 | 36 | 2019/9/3  | 139.45 | 56.82 | 1.59  |
|         | LANDSAT8_OLI | LC81460362019262LGN00 | 146 | 36 | 2019/9/19 | 146.74 | 52.25 | 2     |
|         | LANDSAT8_OLI | LC81460362020265LGN00 | 146 | 36 | 2020/9/21 | 147.83 | 51.39 | 0.66  |
|         | LANDSAT8_OLI | LC81460372018211LGN00 | 146 | 37 | 2018/7/30 | 119.35 | 64.52 | 2.93  |
|         | LANDSAT8_OLI | LC81460372018243LGN00 | 146 | 37 | 2018/8/31 | 135.83 | 58.33 | 0.88  |
|         | LANDSAT8_OLI | LC81460372018259LGN00 | 146 | 37 | 2018/9/16 | 143.77 | 54.03 | 1.2   |
|         | LANDSAT8_OLI | LC81460372019246LGN00 | 146 | 37 | 2019/9/3  | 137.51 | 57.73 | 10.1  |
|         | LANDSAT8_OLI | LC81460372019262LGN00 | 146 | 37 | 2019/9/19 | 145.24 | 53.3  | 0.68  |
|         | LANDSAT8_OLI | LC81460372020217LGN00 | 146 | 37 | 2020/8/4  | 122.15 | 63.79 | 19.34 |
|         | LANDSAT8_OLI | LC81460372020249LGN00 | 146 | 37 | 2020/9/5  | 138.9  | 57.01 | 16.01 |
|         | LANDSAT8_OLI | LC81460372020265LGN00 | 146 | 37 | 2020/9/21 | 146.41 | 52.46 | 0.35  |
|         | LANDSAT8_OLI | LC81470352018234LGN00 | 147 | 35 | 2018/8/22 | 135.53 | 58.79 | 24.69 |
|         | LANDSAT8_OLI | LC81470352019205LGN00 | 147 | 35 | 2019/7/24 | 123.18 | 64.51 | 6.03  |
|         | LANDSAT8_OLI | LC81470352019253LGN00 | 147 | 35 | 2019/9/10 | 144.43 | 53.9  | 0.74  |
|         | LANDSAT8_OLI | LC81470352019269LGN00 | 147 | 35 | 2019/9/26 | 150.79 | 48.95 | 1.06  |
|         | LANDSAT8_OLI | LC81470362018234LGN00 | 147 | 36 | 2018/8/22 | 133.33 | 59.62 | 22.71 |
|         | LANDSAT8_OLI | LC81470362019253LGN00 | 147 | 36 | 2019/9/10 | 142.78 | 54.9  | 1.61  |
|         | LANDSAT8_OLI | LC81470362019269LGN00 | 147 | 36 | 2019/9/26 | 149.51 | 50.07 | 2.91  |
|         | LANDSAT8_OLI | LC81470362020256LGN00 | 147 | 36 | 2020/9/12 | 144    | 54.1  | 9.43  |
|         | LANDSAT8_OLI | LC81470372018234LGN00 | 147 | 37 | 2018/8/22 | 131.03 | 60.39 | 21.54 |
|         | LANDSAT8_OLI | LC81470372019253LGN00 | 147 | 37 | 2019/9/10 | 141.04 | 55.88 | 1     |
|         | LANDSAT8_OLI | LC81470372019269LGN00 | 147 | 37 | 2019/9/26 | 148.18 | 51.17 | 6.28  |
|         | LANDSAT8_OLI | LC81470372020224LGN00 | 147 | 37 | 2020/8/11 | 125.69 | 62.58 | 13.69 |
|         | LANDSAT8_OLI | LC81470372020256LGN00 | 147 | 37 | 2020/9/12 | 142.35 | 55.1  | 3.04  |
|         | LANDSAT8_OLI | LC81480342019228LGN00 | 148 | 34 | 2019/8/16 | 135.12 | 59.51 | 16.89 |
|         | LANDSAT8_OLI | LC81480342019244LGN00 | 148 | 34 | 2019/9/1  | 142.2  | 55.46 | 3.58  |
|         | LANDSAT8_OLI | LC81480342020231LGN00 | 148 | 34 | 2020/8/18 | 136.3  | 58.85 | 1.25  |
|         | LANDSAT8_OLI | LC81480342020247LGN00 | 148 | 34 | 2020/9/3  | 143.36 | 54.68 | 20.88 |
|         | LANDSAT8_OLI | LC81480352018241LGN00 | 148 | 35 | 2018/8/29 | 138.85 | 57.06 | 20.12 |
|         | LANDSAT8_OLI | LC81480352019212LGN00 | 148 | 35 | 2019/7/31 | 125.79 | 63.41 | 24.49 |
|         | LANDSAT8_OLI | LC81480352020263LGN00 | 148 | 35 | 2020/9/19 | 148.43 | 50.93 | 4.49  |
|         | LANDSAT8_OLI | LC81480362018241LGN00 | 148 | 36 | 2018/8/29 | 136.86 | 57.95 | 5.56  |
|         | LANDSAT8_OLI | LC81480362019228LGN00 | 148 | 36 | 2019/8/16 | 130.45 | 61.08 | 12.62 |
|         | LANDSAT8_OLI | LC81480362020215LGN00 | 148 | 36 | 2020/8/2  | 124.09 | 63.54 | 23    |
|         | LANDSAT8_OLI | LC81480362020247LGN00 | 148 | 36 | 2020/9/3  | 139.79 | 56.61 | 15.4  |
|         | LANDSAT8_OLI | LC81480362020263LGN00 | 148 | 36 | 2020/9/19 | 147.02 | 52.01 | 1.5   |
|         | LANDSAT8_OLI | LC81490342018200LGN00 | 149 | 34 | 2018/7/19 | 124.43 | 64.49 | 23.06 |



| Periods | Satellite    | Image ID              | P   | R  | AD        | SA(°)  | SE(°) | CC(%) |
|---------|--------------|-----------------------|-----|----|-----------|--------|-------|-------|
|         | LANDSAT8_OLI | LC81490342018216LGN00 | 149 | 34 | 2018/8/4  | 129.89 | 61.86 | 10.01 |
|         | LANDSAT8_OLI | LC81490342018232LGN00 | 149 | 34 | 2018/8/20 | 136.73 | 58.42 | 16.87 |
|         | LANDSAT8_OLI | LC81490342018264LGN00 | 149 | 34 | 2018/9/21 | 150.14 | 49.3  | 12.04 |
|         | LANDSAT8_OLI | LC81490342019235LGN00 | 149 | 34 | 2019/8/23 | 138.22 | 57.83 | 10.16 |
|         | LANDSAT8_OLI | LC81490342019267LGN00 | 149 | 34 | 2019/9/24 | 151.33 | 48.47 | 0.48  |
|         | LANDSAT8_OLI | LC81490342020206LGN00 | 149 | 34 | 2020/7/24 | 126.32 | 63.77 | 11.4  |
|         | LANDSAT8_OLI | LC81490342020238LGN00 | 149 | 34 | 2020/8/25 | 139.41 | 57.12 | 1.92  |
|         | LANDSAT8_OLI | LC81490342020254LGN00 | 149 | 34 | 2020/9/10 | 146.29 | 52.63 | 16.63 |
|         | LANDSAT8_OLI | LC81490352018216LGN00 | 149 | 35 | 2018/8/4  | 127.27 | 62.55 | 2.57  |
|         | LANDSAT8_OLI | LC81490352018232LGN00 | 149 | 35 | 2018/8/20 | 134.58 | 59.26 | 17.03 |
|         | LANDSAT8_OLI | LC81490352018264LGN00 | 149 | 35 | 2018/9/21 | 148.82 | 50.41 | 10.56 |
|         | LANDSAT8_OLI | LC81490352019203LGN00 | 149 | 35 | 2019/7/22 | 122.52 | 64.8  | 22.71 |
|         | LANDSAT8_OLI | LC81490352019219LGN00 | 149 | 35 | 2019/8/7  | 128.73 | 62.15 | 9.79  |
|         | LANDSAT8_OLI | LC81490352019235LGN00 | 149 | 35 | 2019/8/23 | 136.15 | 58.71 | 19.61 |
|         | LANDSAT8_OLI | LC81490352019267LGN00 | 149 | 35 | 2019/9/24 | 150.07 | 49.59 | 1.11  |
|         | LANDSAT8_OLI | LC81490352020206LGN00 | 149 | 35 | 2020/7/24 | 123.4  | 64.38 | 3.22  |
|         | LANDSAT8_OLI | LC81490352020238LGN00 | 149 | 35 | 2020/8/25 | 137.42 | 58.02 | 5.48  |
|         | LANDSAT8_OLI | LC81490362018216LGN00 | 149 | 36 | 2018/8/4  | 124.54 | 63.19 | 10.23 |
|         | LANDSAT8_OLI | LC81490362018232LGN00 | 149 | 36 | 2018/8/20 | 132.33 | 60.06 | 15.61 |
|         | LANDSAT8_OLI | LC81490362018264LGN00 | 149 | 36 | 2018/9/21 | 147.44 | 51.49 | 5.24  |
|         | LANDSAT8_OLI | LC81490362019235LGN00 | 149 | 36 | 2019/8/23 | 133.98 | 59.54 | 18.28 |
|         | LANDSAT8_OLI | LC81490362019251LGN00 | 149 | 36 | 2019/9/8  | 141.85 | 55.46 | 16.34 |
|         | LANDSAT8_OLI | LC81490362019267LGN00 | 149 | 36 | 2019/9/24 | 148.75 | 50.7  | 8.73  |
|         | LANDSAT8_OLI | LC81490362020206LGN00 | 149 | 36 | 2020/7/24 | 120.37 | 64.92 | 14.55 |
|         | LANDSAT8_OLI | LC81490362020254LGN00 | 149 | 36 | 2020/9/10 | 143.1  | 54.68 | 11.55 |
|         | LANDSAT8_OLI | LC81500342018255LGN00 | 150 | 34 | 2018/9/12 | 146.69 | 52.12 | 1.74  |
|         | LANDSAT8_OLI | LC81500342019258LGN00 | 150 | 34 | 2019/9/15 | 148.01 | 51.34 | 13.81 |
|         | LANDSAT8_OLI | LC81500342020213LGN00 | 150 | 34 | 2020/7/31 | 128.78 | 62.59 | 4.44  |
|         | LANDSAT8_OLI | LC81500342020229LGN00 | 150 | 34 | 2020/8/16 | 135.42 | 59.32 | 1.48  |
|         | LANDSAT8_OLI | LC81500352018223LGN00 | 150 | 35 | 2018/8/11 | 130.37 | 61.21 | 4.18  |
|         | LANDSAT8_OLI | LC81500352018255LGN00 | 150 | 35 | 2018/9/12 | 145.17 | 53.16 | 1.41  |
|         | LANDSAT8_OLI | LC81500352019258LGN00 | 150 | 35 | 2019/9/15 | 146.56 | 52.41 | 16.99 |
|         | LANDSAT8_OLI | LC81500352020229LGN00 | 150 | 35 | 2020/8/16 | 133.16 | 60.13 | 2.24  |

**Table S2** The results of multi-manual digitization of 37 glaciers. STD is standard deviation and Diff. is glacier area difference between the mean of MMD results and KGI-2020s.

| MMD Type                             | Glacier | MMD results            |        |        |      | This Study |                        |                         |          |
|--------------------------------------|---------|------------------------|--------|--------|------|------------|------------------------|-------------------------|----------|
|                                      |         | Area(km <sup>2</sup> ) |        |        |      | %          | KGI-2020s              | Diff.(km <sup>2</sup> ) | Diff.(%) |
|                                      |         | MIN                    | MAX    | MEAN   | STD  | STD        | Area(km <sup>2</sup> ) |                         |          |
| <b>Image: Landsat 8 30 m image</b>   | 1       | 0.74                   | 0.98   | 0.87   | 0.10 | 11.81      | 0.69                   | -0.18                   | -26.18   |
| <b>Date:2020-08-25</b>               | 2       | 2.40                   | 3.27   | 2.87   | 0.36 | 12.60      | 2.56                   | -0.31                   | -10.87   |
| <b>Number of digitization: 4</b>     | 3       | 1.71                   | 2.02   | 1.84   | 0.15 | 8.09       | 1.74                   | -0.10                   | -5.53    |
|                                      | 4       | 0.55                   | 0.83   | 0.68   | 0.12 | 17.63      | 0.84                   | 0.16                    | 23.16    |
|                                      | 5       | 0.64                   | 0.84   | 0.69   | 0.10 | 14.09      | 0.61                   | -0.08                   | -11.88   |
|                                      | 6       | 0.13                   | 0.21   | 0.15   | 0.04 | 25.93      | 0.13                   | -0.03                   | -18.12   |
|                                      | 7       | 0.14                   | 0.17   | 0.15   | 0.01 | 9.83       | 0.14                   | -0.01                   | -7.53    |
|                                      | 8       | 2.95                   | 3.07   | 3.01   | 0.05 | 1.54       | 2.75                   | -0.25                   | -8.42    |
|                                      | 9       | 8.33                   | 8.59   | 8.46   | 0.11 | 1.34       | 7.49                   | -0.97                   | -11.42   |
|                                      | 10      | 4.26                   | 4.87   | 4.57   | 0.25 | 5.46       | 4.71                   | 0.14                    | 3.00     |
|                                      | 11      | 0.26                   | 0.37   | 0.33   | 0.05 | 15.62      | 0.32                   | -0.01                   | -3.41    |
|                                      | 12      | 2.62                   | 3.07   | 2.89   | 0.21 | 7.34       | 3.03                   | 0.14                    | 4.80     |
|                                      | 13      | 1.23                   | 1.31   | 1.28   | 0.04 | 3.17       | 1.28                   | 0.00                    | -0.30    |
|                                      | 14      | 1.36                   | 1.50   | 1.42   | 0.07 | 4.63       | 1.21                   | -0.21                   | -14.75   |
|                                      | 15      | 1.55                   | 2.15   | 1.86   | 0.25 | 13.57      | 1.43                   | -0.44                   | -23.38   |
|                                      | 16      | 0.53                   | 0.66   | 0.61   | 0.05 | 9.04       | 0.65                   | 0.05                    | 7.88     |
|                                      | 17      | 0.17                   | 0.22   | 0.19   | 0.02 | 11.53      | 0.10                   | -0.09                   | -49.01   |
|                                      | All     | 29.55                  | 34.12  | 31.88  | 0.73 | 2.29       | 29.67                  | -2.21                   | -6.92    |
| <b>Image: Sentinel-2 10 m images</b> | 18      | 1.13                   | 1.24   | 1.20   | 0.05 | 4.04       | 1.15                   | -0.06                   | -4.65    |
| <b>Date:2020-08-25, 2020-08-23</b>   | 19      | 2.32                   | 2.68   | 2.47   | 0.12 | 4.85       | 3.17                   | 0.70                    | 28.29    |
| <b>Number of digitization: 5</b>     | 20      | 10.58                  | 10.75  | 10.67  | 0.08 | 0.75       | 12.33                  | 1.67                    | 15.63    |
|                                      | 21      | 4.88                   | 5.25   | 5.06   | 0.16 | 3.10       | 6.85                   | 1.78                    | 35.24    |
|                                      | 22      | 4.23                   | 4.28   | 4.25   | 0.02 | 0.48       | 3.95                   | -0.30                   | -7.00    |
|                                      | 23      | 0.51                   | 0.59   | 0.54   | 0.03 | 6.42       | 0.61                   | 0.07                    | 13.41    |
|                                      | 24      | 3.50                   | 3.60   | 3.55   | 0.04 | 1.02       | 4.11                   | 0.56                    | 15.84    |
|                                      | 25      | 3.68                   | 3.75   | 3.72   | 0.03 | 0.71       | 4.15                   | 0.43                    | 11.56    |
|                                      | 26      | 7.81                   | 8.80   | 8.40   | 0.18 | 2.16       | 9.07                   | 0.68                    | 8.04     |
|                                      | 27      | 4.80                   | 5.58   | 5.24   | 0.24 | 4.51       | 5.35                   | 0.11                    | 2.13     |
|                                      | 28      | 9.22                   | 10.32  | 9.85   | 0.21 | 2.17       | 12.47                  | 2.61                    | 26.54    |
|                                      | 29      | 3.64                   | 4.21   | 3.78   | 0.28 | 7.39       | 4.33                   | 0.55                    | 14.42    |
|                                      | 30      | 60.44                  | 64.59  | 62.12  | 1.85 | 2.97       | 61.45                  | -0.68                   | -1.09    |
|                                      | 31      | 29.02                  | 29.93  | 29.26  | 0.44 | 1.51       | 30.87                  | 1.61                    | 5.49     |
|                                      | 32      | 14.77                  | 15.11  | 14.93  | 0.13 | 0.90       | 16.69                  | 1.76                    | 11.79    |
|                                      | 33      | 93.46                  | 95.51  | 94.70  | 0.48 | 0.51       | 96.13                  | 1.43                    | 1.51     |
|                                      | 34      | 8.05                   | 8.34   | 8.15   | 0.14 | 1.71       | 8.88                   | 0.73                    | 8.94     |
|                                      | 35      | 16.80                  | 17.15  | 16.91  | 0.16 | 0.94       | 19.15                  | 2.25                    | 13.29    |
|                                      | All     | 278.85                 | 291.67 | 284.81 | 3.58 | 1.26       | 300.71                 | 15.90                   | 5.58     |
| <b>Image: Sentinel-2 10 m image</b>  | 1       | -                      | -      | 1.22   | -    | -          | 0.69                   | -0.53                   | -77.18   |
| <b>Date:2020-08-25</b>               | 2       | -                      | -      | 2.57   | -    | -          | 2.56                   | -0.01                   | -0.46    |
| <b>Number of digitization: 1</b>     | 3       | -                      | -      | 1.46   | -    | -          | 1.74                   | 0.28                    | 16.16    |

| MMD Type                         | Glacier | MMD results            |     |        |     | This Study |                         |          |         |
|----------------------------------|---------|------------------------|-----|--------|-----|------------|-------------------------|----------|---------|
|                                  |         | Area(km <sup>2</sup> ) |     | %      |     | KGI-2020s  | Diff.(km <sup>2</sup> ) | Diff.(%) |         |
|                                  |         | MIN                    | MAX | MEAN   | STD | STD        | Area(km <sup>2</sup> )  |          |         |
|                                  | 4       | -                      | -   | 0.69   | -   | -          | 0.84                    | 0.15     | 18.00   |
|                                  | 5       | -                      | -   | 0.70   | -   | -          | 0.61                    | -0.09    | -14.85  |
|                                  | 6       | -                      | -   | 0.14   | -   | -          | 0.13                    | -0.02    | -13.43  |
|                                  | 7       | -                      | -   | 0.16   | -   | -          | 0.14                    | -0.02    | -11.67  |
|                                  | 8       | -                      | -   | 3.17   | -   | -          | 2.75                    | -0.42    | -15.29  |
|                                  | 9       | -                      | -   | 8.55   | -   | -          | 7.49                    | -1.06    | -14.13  |
|                                  | 10      | -                      | -   | 4.59   | -   | -          | 4.71                    | 0.12     | 2.50    |
|                                  | 11      | -                      | -   | 0.23   | -   | -          | 0.32                    | 0.08     | 26.18   |
|                                  | 12      | -                      | -   | 3.02   | -   | -          | 3.03                    | 0.01     | 0.45    |
|                                  | 13      | -                      | -   | 1.25   | -   | -          | 1.28                    | 0.03     | 2.38    |
|                                  | 14      | -                      | -   | 1.31   | -   | -          | 1.21                    | -0.10    | -8.65   |
|                                  | 15      | -                      | -   | 1.68   | -   | -          | 1.43                    | -0.25    | -17.41  |
|                                  | 16      | -                      | -   | 0.60   | -   | -          | 0.65                    | 0.05     | 7.66    |
|                                  | 17      | -                      | -   | 0.22   | -   | -          | 0.10                    | -0.12    | -124.73 |
|                                  | All     | -                      | -   | 31.57  | -   | -          | 29.67                   | -1.90    | -6.39   |
| <b>Image: Planet 3m image</b>    | 36      | -                      | -   | 13.74  | -   | -          | 14.83                   | 1.09     | 7.34    |
| <b>Date:2019-05-29</b>           | 37      | -                      | -   | 16.26  | -   | -          | 15.94                   | -0.32    | -2.01   |
| <b>Number of digitization: 1</b> | All     | -                      | -   | 30.00  | -   | -          | 30.76                   | 0.77     | 2.56    |
| <b>All types</b>                 | Total   | -                      | -   | 376.95 | -   | -          | 390.83                  | 13.88    | 3.68    |

**Table S3.** Debris cover area of glaciers according to different size class or regions during 1990~2020.

| Size / Regions | Glacier Aara (%) | Debris Area (DA) (km <sup>2</sup> ) |         |         |         | DA (%) | DA Change (1990-2020) |        |
|----------------|------------------|-------------------------------------|---------|---------|---------|--------|-----------------------|--------|
|                | 2020s            | 1990s                               | 2000s   | 2010s   | 2020s   | 2020s  | (km <sup>2</sup> )    | (%)    |
| < 0.05         | 0.16             | 0.03                                | 2.37    | 0.04    | 0.16    | 0.01   | 0.14                  | 528.2  |
| 0.05 ~ 0.1     | 0.53             | 0.06                                | 0.27    | 0.05    | 0.53    | 0.02   | 0.47                  | 799.04 |
| 0.1 ~ 0.5      | 4.11             | 8.43                                | 12.65   | 5.28    | 9.58    | 0.42   | 1.15                  | 13.65  |
| 0.5 ~ 1        | 4.52             | 21.74                               | 33.9    | 22.37   | 39.46   | 1.72   | 17.72                 | 81.47  |
| 1 ~ 5          | 18.72            | 179.17                              | 219.31  | 196.44  | 258.3   | 11.27  | 79.12                 | 44.16  |
| 5 ~ 10         | 9.91             | 129.23                              | 159.55  | 144.31  | 170.76  | 7.45   | 41.53                 | 32.14  |
| 10 ~ 50        | 19.12            | 356.49                              | 384.38  | 355.69  | 413.90  | 18.07  | 57.41                 | 16.1   |
| 50 ~ 100       | 9.77             | 280.04                              | 317.26  | 294.72  | 321.21  | 14.02  | 41.17                 | 14.7   |
| > 100          | 33.01            | 975.65                              | 1044.23 | 999.36  | 1088.83 | 47.53  | 113.18                | 11.60  |
| WK             | 27.15            | 734.92                              | 781.57  | 695.62  | 804.32  | 35.11  | 69.4                  | 9.44   |
| CK             | 55.28            | 1162.03                             | 1293.82 | 1228.2  | 1382.68 | 60.35  | 220.65                | 18.99  |
| EK             | 17.57            | 50.69                               | 84.87   | 91.55   | 103.95  | 4.54   | 53.25                 | 105.05 |
| NK             | 54.74            | 621.21                              | 690.84  | 694.06  | 790.1   | 34.49  | 168.89                | 27.19  |
| SK             | 45.26            | 1326.44                             | 1469.42 | 1321.31 | 1500.85 | 65.51  | 174.41                | 13.15  |
| <b>Total</b>   | -                | 1947.65                             | 2160.26 | 2015.37 | 2290.95 | -      | 343.30                | 17.63  |

**Table S4.** KGI-2020s inventory topographic parameters (elevation units: m a.s.l.)

| Glacier size (km <sup>2</sup> ) | < 0.05 | 0.05 - 0.1 | 0.1 - 0.5 | 0.5 - 1 | 1 - 5 | 5 - 10 | 10- 50 | 50 - 100 | > 100 | DF    | DC    |
|---------------------------------|--------|------------|-----------|---------|-------|--------|--------|----------|-------|-------|-------|
| <b>Min elevation</b>            | 4143   | 3988       | 3609      | 3237    | 2719  | 2801   | 2401   | 2412     | 2608  | 3175  | 2401  |
| <b>Max elevation</b>            | 7856   | 7265       | 7923      | 6739    | 7146  | 7810   | 7681   | 8546     | 8564  | 7923  | 8564  |
| <b>Median elevation</b>         | 5713   | 5543       | 5493      | 5471    | 5468  | 5487   | 5465   | 5280     | 5388  | 5567  | 5270  |
| <b>Elevation range</b>          | 3713   | 3277       | 4314      | 3502    | 4427  | 5009   | 5280   | 6134     | 5956  | 4748  | 6163  |
| <b>Mean slope (°)</b>           | 28.76  | 30.72      | 29.76     | 27.25   | 23.62 | 20.71  | 20.03  | 21.75    | 19.6  | 28.45 | 24.63 |

\* DF: Debris-free (clean ice/snow); DC: Debris-covered

**Table S5.** Number and area of glaciers according to different regions during 1990~2020.

| Regions      | Glacier Number (GN) |       |       |       | Glacier Area (GA) (km <sup>2</sup> ) |          |          |          | GN (%) | GA (%) | AC (%)    |
|--------------|---------------------|-------|-------|-------|--------------------------------------|----------|----------|----------|--------|--------|-----------|
|              | 1990s               | 2000s | 2010s | 2020s | 1990s                                | 2000s    | 2010s    | 2020s    | 2020s  |        | 1990-2020 |
| <b>WK</b>    | 3124                | 3108  | 3031  | 3054  | 6036.59                              | 6063.33  | 6135.14  | 6112.65  | 29.09  | 27.15  | 1.26      |
| <b>CK</b>    | 4722                | 4379  | 4687  | 4589  | 12362.89                             | 12416.84 | 12547.12 | 12443.78 | 43.71  | 55.28  | 0.65      |
| <b>EK</b>    | 2797                | 2764  | 2733  | 2855  | 4087.81                              | 4096.51  | 4122.60  | 3954.3   | 27.20  | 17.57  | -3.27     |
| <b>NK</b>    | 7084                | 6723  | 7061  | 7080  | 12382.92                             | 12461.6  | 12533.17 | 12321.74 | 67.44  | 54.74  | -0.49     |
| <b>SK</b>    | 3559                | 3528  | 3390  | 3418  | 10104.36                             | 10115.08 | 10271.69 | 10188.99 | 32.56  | 45.26  | 0.84      |
| <b>Total</b> | 10643               | 10251 | 10451 | 10498 | 22487.28                             | 22576.68 | 22804.86 | 22510.73 | 100    | 100    | 0.1       |

**Table S6** Glacier, debris cover, median glacier altitude and its variation ( $\Delta G$ ,  $\Delta D$  and  $\Delta E$ ) in sub-basin of Karakoram mountains during 1999~2020. Note that the basin scale median elevation is calculated from that of all individual glaciers and its error refers to 95% confidence interval.

| Sub-Basin     | Glacier 2020s             | Area-2020s | Debris-2020s | Median Elevation (m a.s.l.) |            |            |            | 1990-2020   |              |            |
|---------------|---------------------------|------------|--------------|-----------------------------|------------|------------|------------|-------------|--------------|------------|
|               | km <sup>2</sup>           |            | (%)          | 1990s                       | 2000s      | 2010s      | 2020s      | $\Delta G$  | $\Delta D$   | $\Delta E$ |
| <b>GH</b>     | 4974.34±250.21            |            | 14.72        | 5219±16.81                  | 5220±16.06 | 5214±16.27 | 5213±16.27 | 62.58±3.15  | 29.90±1.5    | -6         |
| <b>Shigar</b> | 3481.02±175.1             |            | 16.64        | 5114±29.88                  | 5111±28.92 | 5102±30.5  | 5107±30.2  | 49.37±2.48  | 48.59±2.44   | -7         |
| <b>Shyok</b>  | 7918.54±398.3             |            | 7.78         | 5814±10                     | 5817±10    | 5814±10.11 | 5831±10    | -31.86±1.6  | 156.81±7.89  | +7         |
| <b>ST</b>     | 5574.06±280.38            |            | 5.87         | 5595±9.55                   | 5592±9.73  | 5593±9.73  | 5601±9.72  | -50.08±2.52 | 80.96±4.07   | +6         |
| <b>Wakhan</b> | 562.77±28.31              |            | 6.3          | 5122.5±14.62                | 5124±14.73 | 5213±14.68 | 5122±14.46 | -06.55±0.33 | 26.38±1.33   | -5         |
| <b>All</b>    | <b>22510.73 ± 1132.29</b> |            | 10.18        | 5555±7.76                   | 5553±7.76  | 5555±7.84  | 5568±7.85  | 23.45±1.18  | 343.30±17.26 | +13        |

\* GH: Gilgit-Hunza; ST: Sub-Tarim
